# Supplementary material
Source: PubMed Central journal article supplement (PMC3860311)
Supplement: supp_126.24.5657_JCS133819.pdf [file supp_126.24.5657_JCS133819.pdf]

## Supplement Figure S1

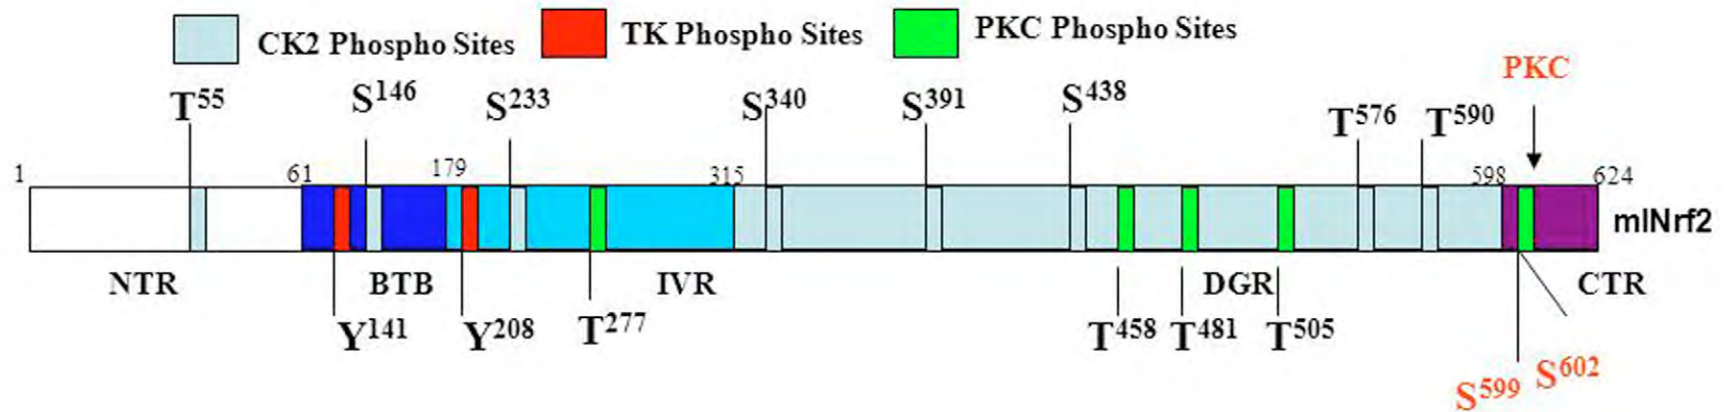

**Figure S1.** Systematic presentation of INrf2 different domains. Prosite search predicated serine, threonine and tyrosine phosphorylation sites of INrf2 are shown. Predicted kinases are also presented. C-terminal unique PKC site which is responsible for INrf2S602 and INrf2S599 phosphorylation is shown. CK2- Casein Kinase 2; TK-Tyrosine Kinase; PKC-Protein Kinase C.

## Supplement Figure S2

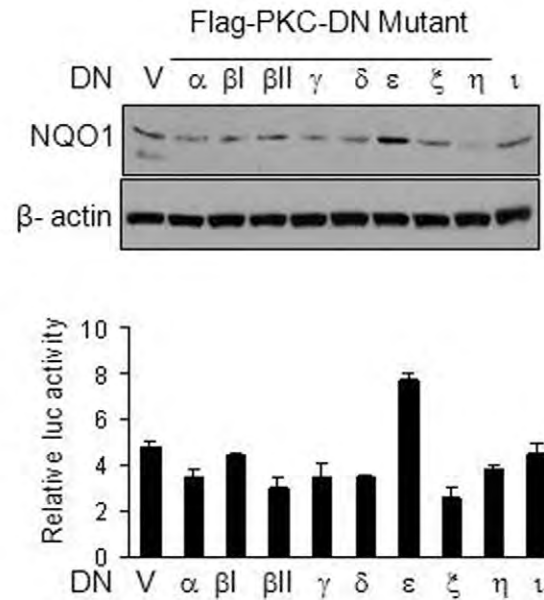

**Figure S2.** Effect of overexpression of various PKC-DNs mutants on Nrf2 downstream NQO1 expression. Upper panel, immunoblotting of HepG2 cell lysates after transfection of PKC-DNs with NQO1 and actin antibodies; Lower panel, NQO1-ARE luciferase activity. The data shown are mean  $\pm$  S.D. of three independent transfection experiments. V- Vector.

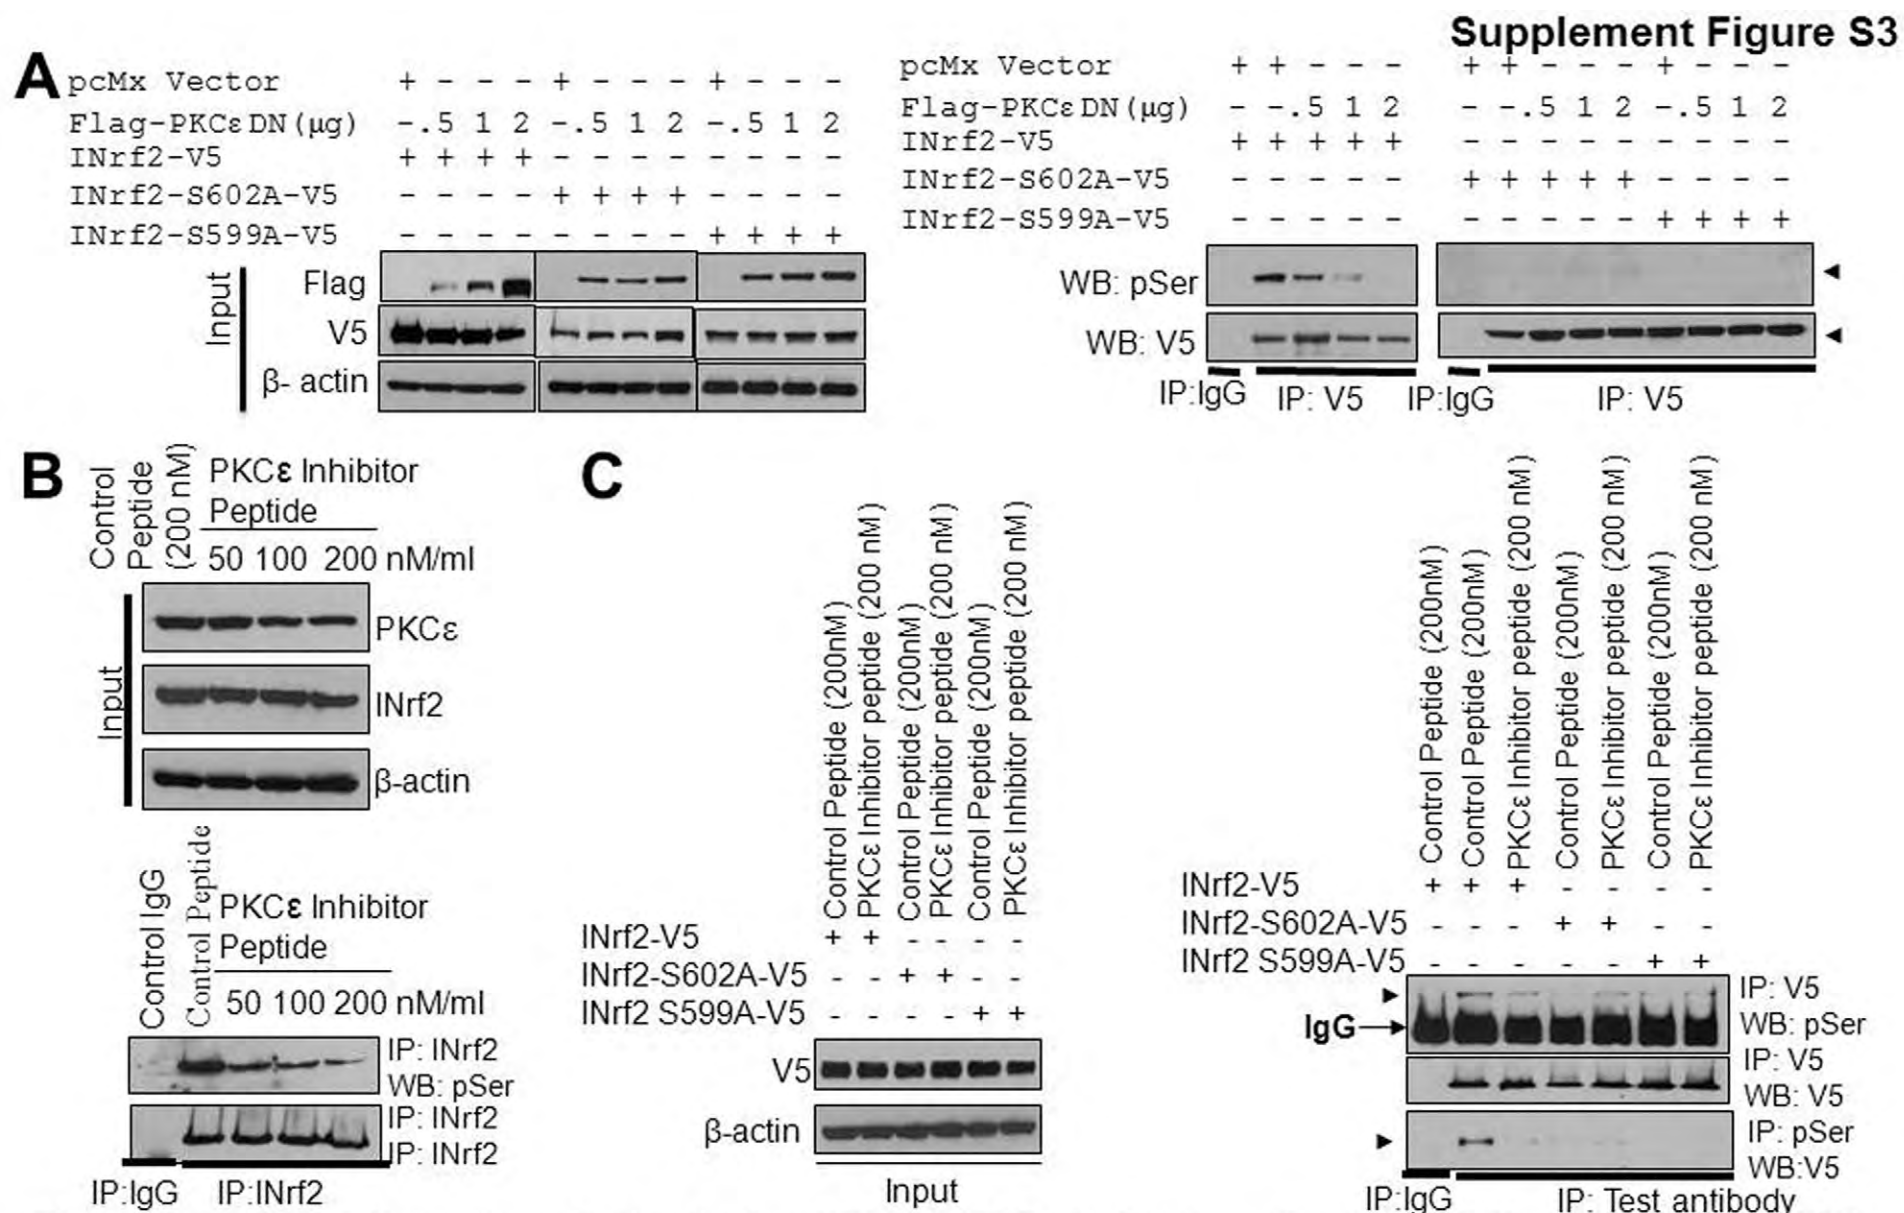

**Figure S3. (A)** Effect of dose dependent inactivation of PKCε by PKCε dominant negative on wild-INrf2 and mutant INrf2 S602A or INrf2S599A serine phosphorylation. The serine phosphorylation was analyzed by immunoprecipitation and immunoblotting using specific antibodies (left and right panels). **(B)** Effect of BSA control peptide and PKCε inhibitor peptide on endogenous INrf2 serine phosphorylation (upper and lower panels). **(C)** Effect of BSA control peptide or PKCε inhibitor peptide on transfected wild INrf2-V5, and INrf2S602A-V5 or INrf2S599A-V5 mutant serine phosphorylation (left and right panels). The serine phosphorylation of INrf2 and mutant INrf2 was analyzed by immunoprecipitation and immunoblotting using specific antibodies.

## Supplement Figure S4

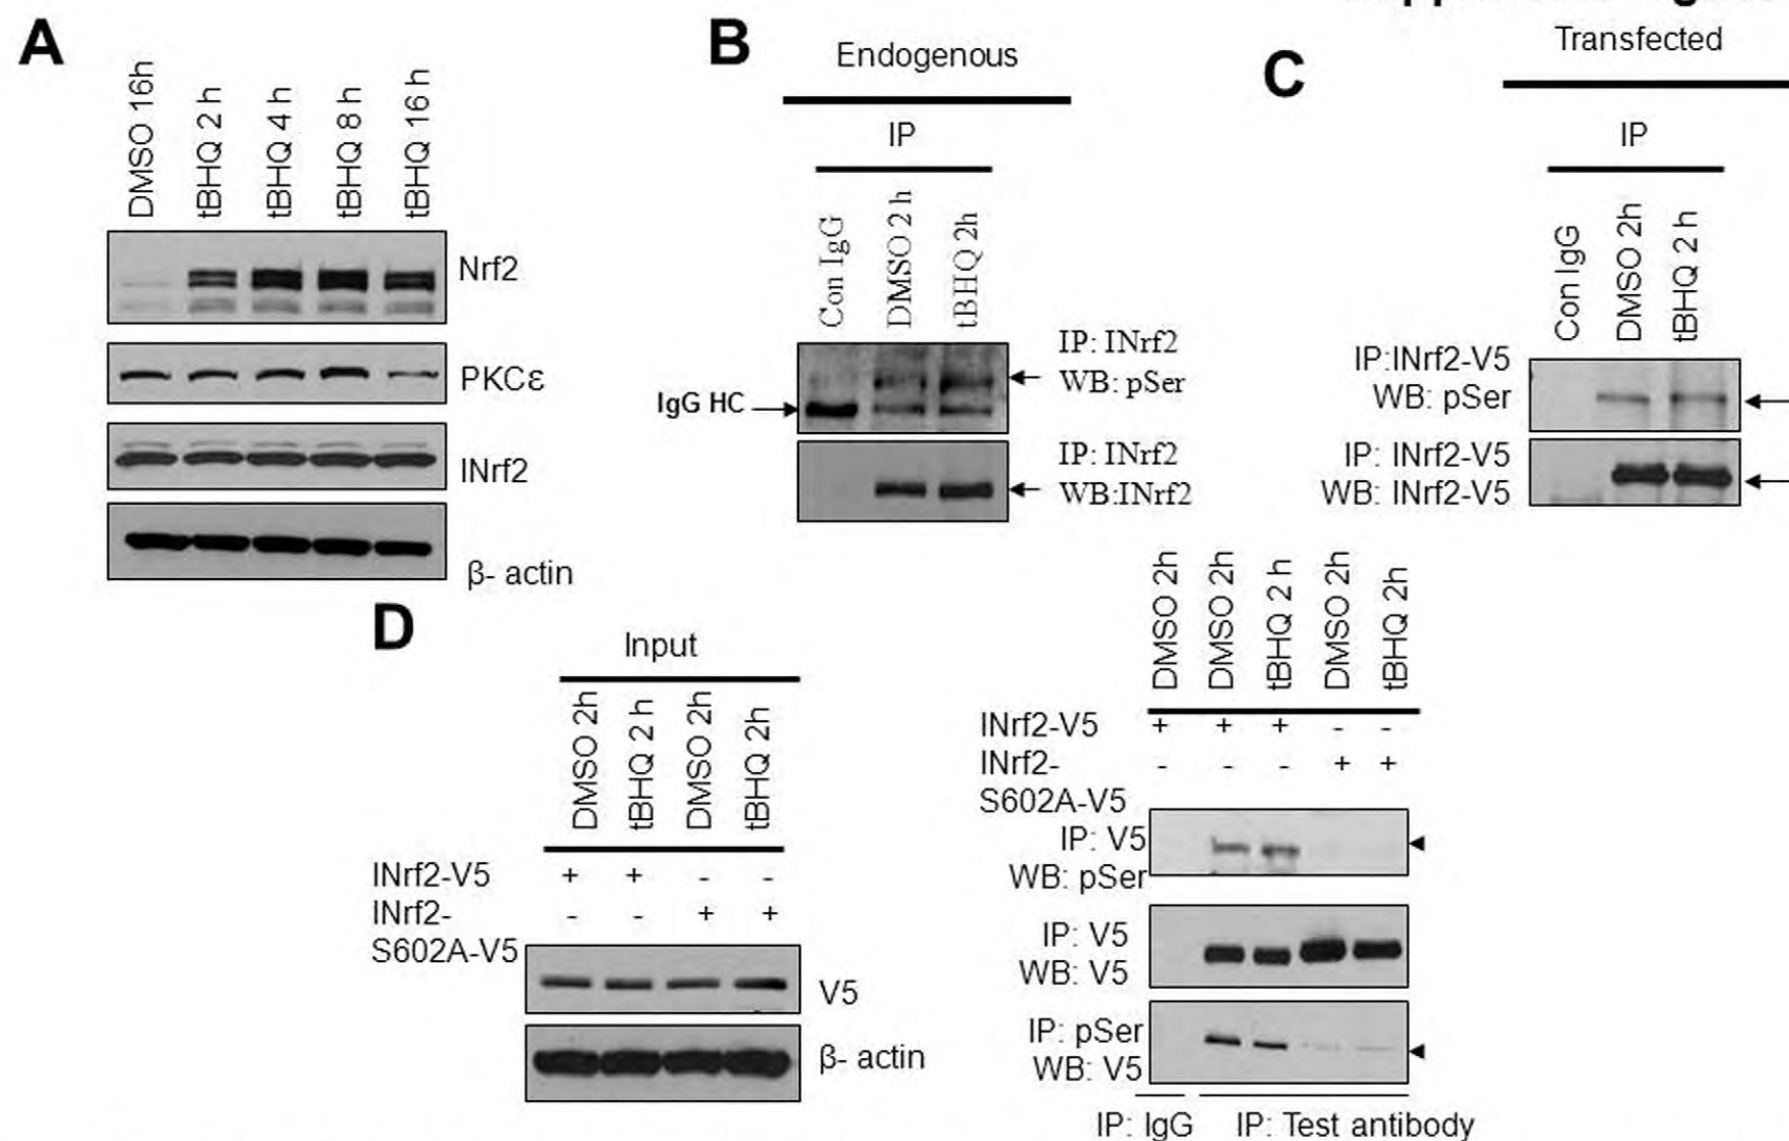

**Figure S4.** Effect of tBHQ on INrf2 serine phosphorylation. (A) HepG2 cells were treated with DMSO or tBHQ for indicated times and lysates were immunoblotted with specific antibodies. (B) DMSO or tBHQ treated (2h) cell lysates were subjected for INrf2 immunoprecipitation followed by immunoblotting with phosphoserine antibodies. (C) HepG2 cells were transfected with INrf2-V5 and treated with DMSO or tBHQ for (2h) and lysates were immunoprecipitated with anti V5 antibody and immunoblotted with phosphoserine antibody. (D) HepG2 cells were transfected with INrf2-V5 or mutant INrf2S602A plasmids and treated with DMSO or tBHQ for (2h). Cell lysates (1mg) were immunoprecipitated and immunoblotted as indicated (left and right panels).

## Supplement Figure S5

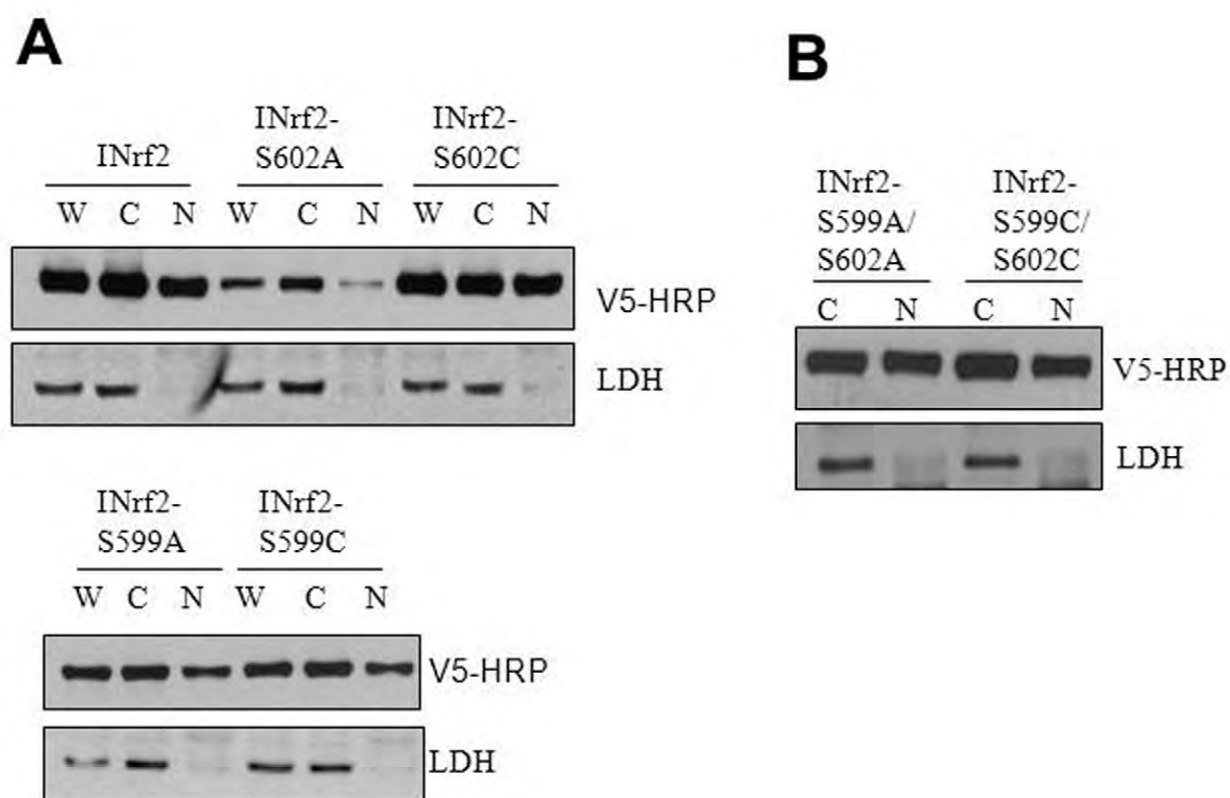

**Figure S5.** (A&B) Cytosolic and nuclear localization of INrf2-V5 and various c-terminal serine single and double mutants of INrf2. HepG2 cells were transfected with wild type INrf2-V5 and various INrf2 mutant constructs as indicated and whole, cytosolic and nuclear lysates were immunoblotted. W- whole. C- cytosol. N- nucleus.

## Supplement Figure S6

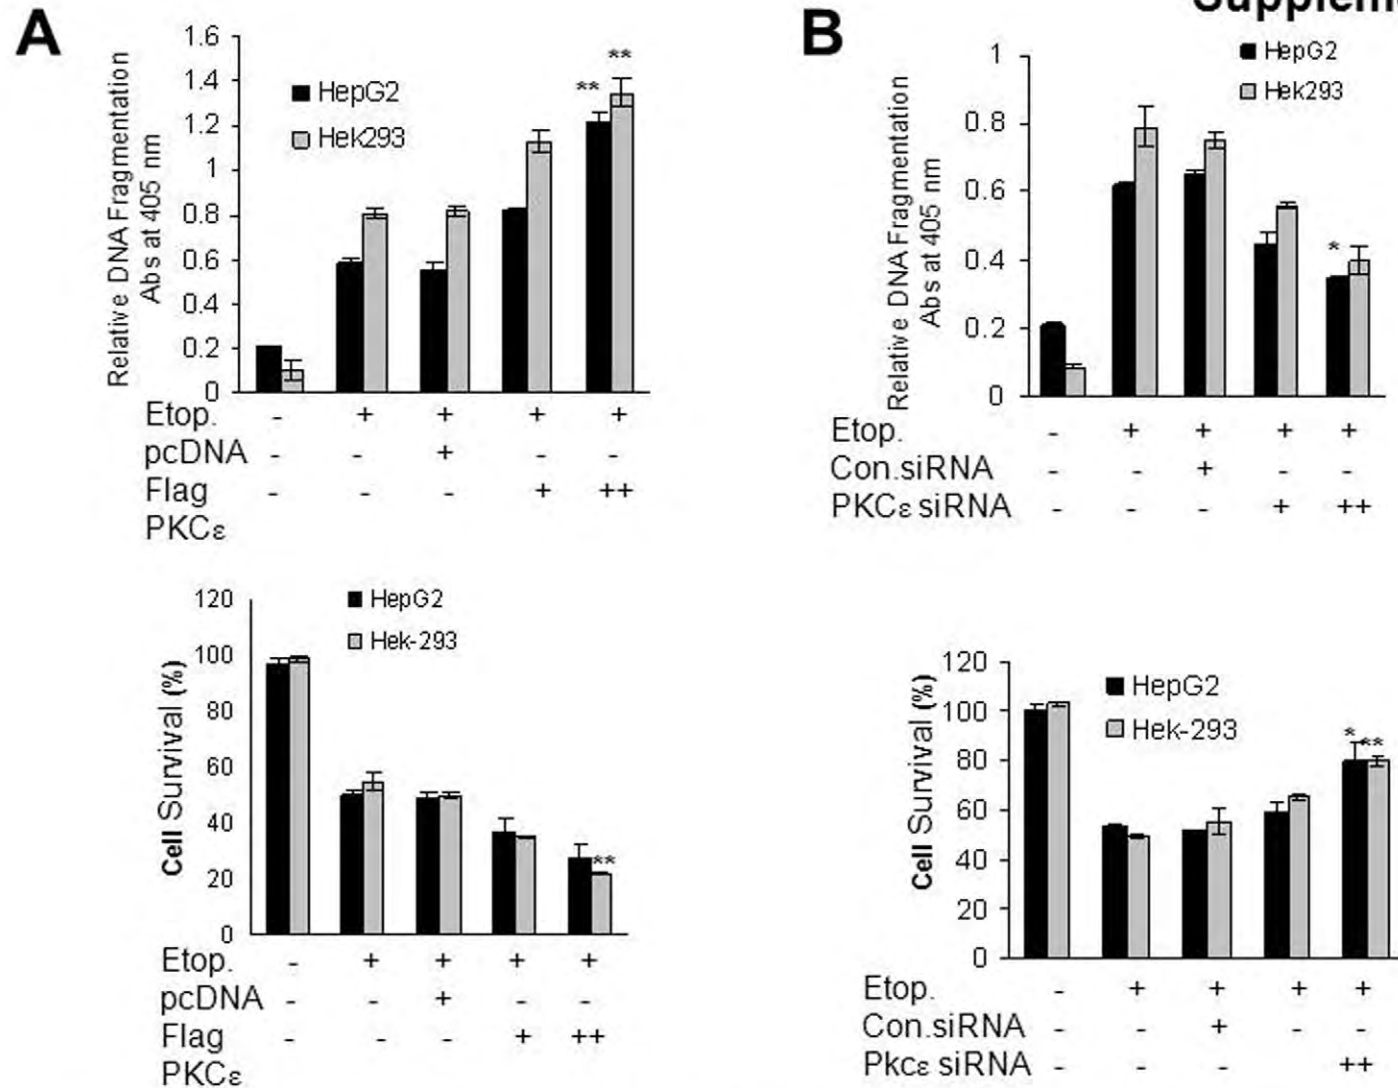

**Figure S6.** (A) Effect of overexpression of PKC $\epsilon$  on etoposide mediated DNA fragmentation and cell survival in HepG2 and Hek293 cell were measured (upper and lower panels). (B) Effect of control siRNA (100 nM) and PKC $\epsilon$  siRNA (50 and 100 nM) on etoposide mediated DNA fragmentation and cell survival in HepG2 and Hek293 cell were measured (upper and lower panels). Small histone associated DNA fragmentation was measured by cell death kit (Roche) and cell survival by MTT assay. The experiments repeated thrice and the data shown are mean  $\pm$  S.D. of three independent experiments. Etop.- etoposide.

## Supplement Figure S7

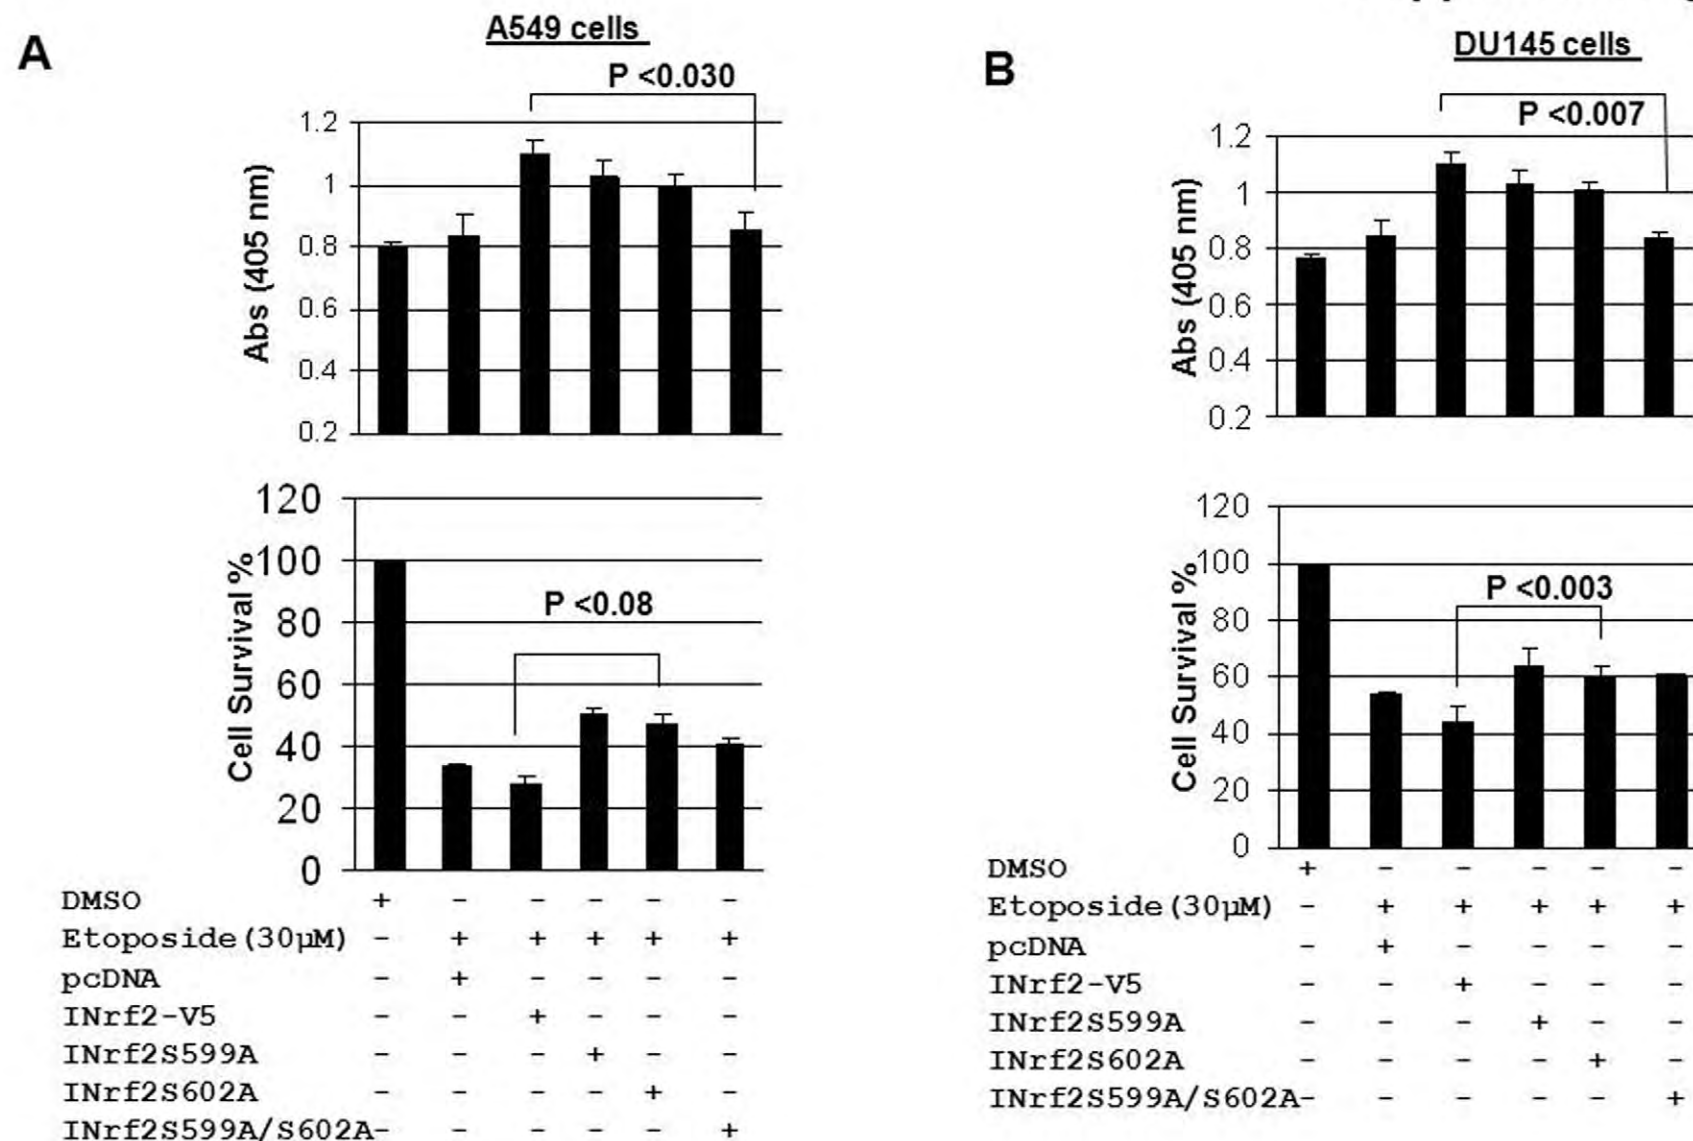

**Figure S7.** Effect of wild type INrf2-V5, INrf2S599A-V5, INrf2S602A-V5 and INrf2S599A/S602A-V5 double mutant expression in A549 cells and DU145 cells and etoposide treatments on cell death/survival. A&B) Lung cancer A549 and Prostate cancer DU145 cells were transfected with indicated plasmids for 18h and treated with etoposide for additional 36h. Small histone associated DNA fragmentation was measured by cell death kit (Roche) and cell survival by MTT assay. The data shown are mean  $\pm$  S.D. of three independent treatments.

## Supplement Figure S8

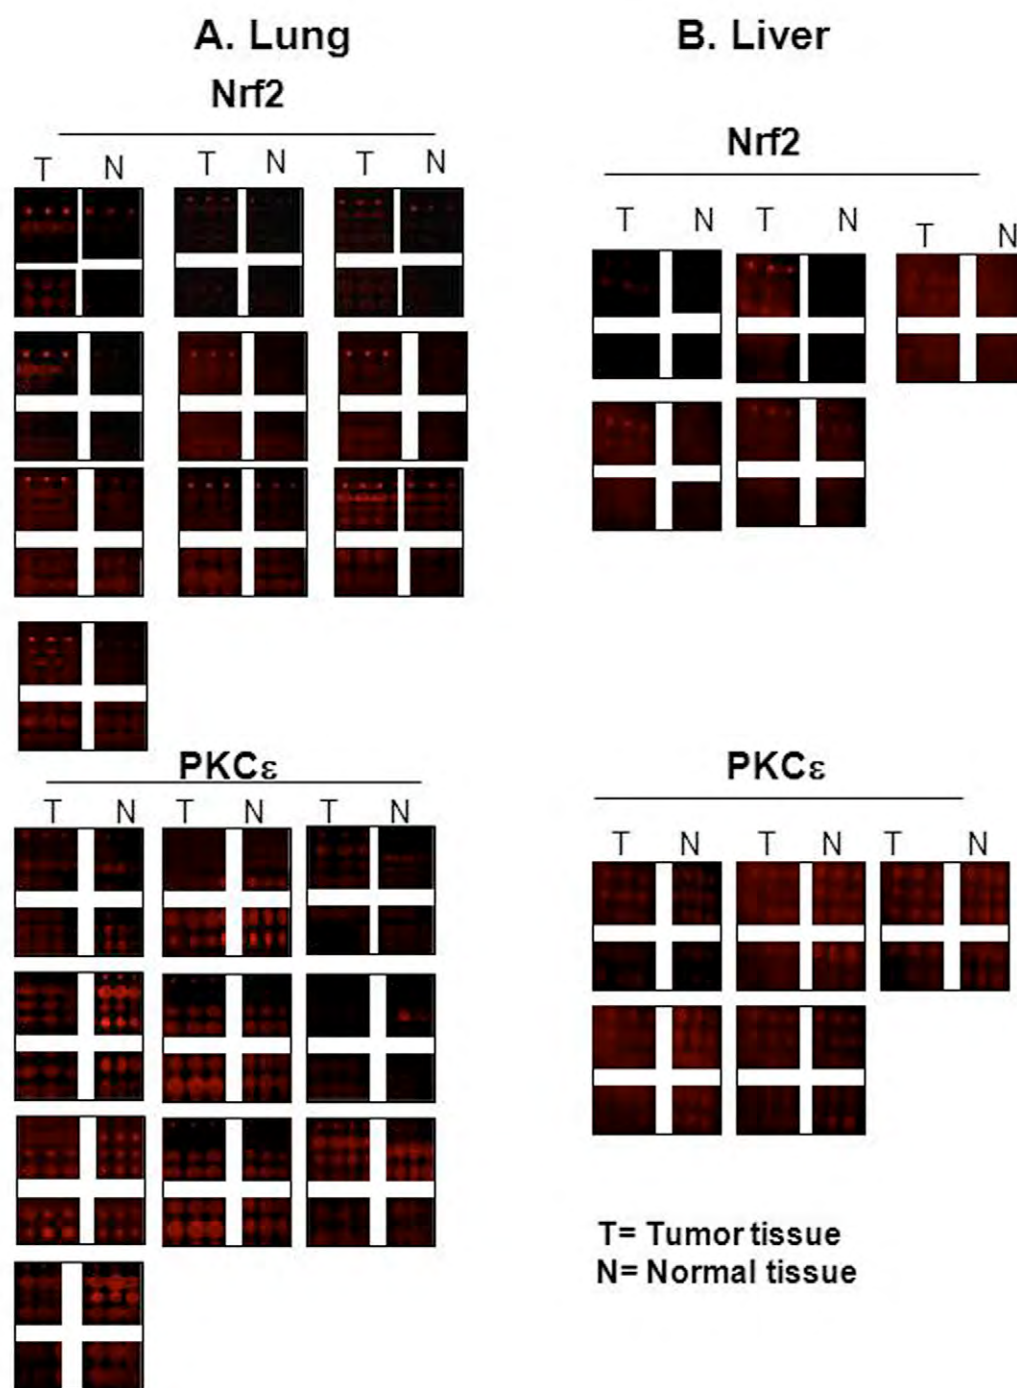

**Figure S8.** (A&B) Nrf2 and PKC $\epsilon$  level analysis from different normal and tumor human tissues by protein microarray analysis. SomaPlex reverse phase protein microarray slides of human lung tumor and normal tissues and human liver tumor and normal tissues were obtained from Protein Biotechnology (Romona, CA). The slides were subjected to immunostaining for Nrf2 and PKC $\epsilon$  antibodies, followed by anti-rabbit Alexa Fluor-594 conjugated secondary antibodies (Invitrogen). After immunostaining, slides were observed under a Nikon fluorescence microscope and photographed (upper and lower panels).



**Table S1.** Sequences of the PCR primers used for construction of various mutants of INrf2

| <b>Construct name</b>   | <b>Sequence of the PCR primer used</b>                                                                          |
|-------------------------|-----------------------------------------------------------------------------------------------------------------|
| pcDNAINrf2S602A-V5      | FP : CC CGC ATG ACA TCT GGC CGC GCT GGG GTG GGT GT<br>RP: GCG GCC AGA TGT CAT GCG GGT CAC CTC ACT CCA GG        |
| pcDNAINrf2S602C-V5      | FP: GCG GCC AGA TGT CAT GCG GGT CAC CTC ACT CCA GG<br>RP:GCG GCC AGA TGT CAT GCG GGT CAC CTC ACT CCA GG         |
| pcDNAINrf2S599A-V5      | FP:GT GAG GTG ACC CGC ATG ACA GCT GGC CGC AGC GG<br>RP:TGT CAT GCG GGT CAC CTC ACT CCA GGT ATC ACT GT           |
| pcDNAINrf2S599C-V5      | FP:AGT GAG GTG ACC CGC ATG ACA TGT GGC CGC AGC GG<br>RP:TGT CAT GCG GGT CAC CTC ACT CCA GGT ATC ACT GT          |
| pcDNAINrf2S599AS602A-V5 | FP:GTG ACC CGC ATG ACA GCT GGC CGC GCC GGG GTG GGT GTG<br>RP:TGT CAT GCG GGT CAC CTC ACT CCA GGT ATC ACT GT     |
| pcDNAINrf2S599CS602C-V5 | FP:GTG ACC CGC ATG ACA TGT GGC CGC TGC GGG GTG GGT GTG<br>RP: RP:TGT CAT GCG GGT CAC CTC ACT CCA GGT ATC ACT GT |
| pcMxFlag-PKCε           | FP:AGCGGC AGATCT ATG GTA GTG TTC AAT GGC CTT CTT<br>RP AGGATT CTCGAG TCA GGG CAT CAG GTC TTC ACC AA             |
| INrf2 S602A -HIS-Tagged | FP:ATG ACA TCT GGC CGC GCT GGG GTG GGT GTG GCC<br>RP:GGC CAC ACC CAC CCC AGC GCG GCC AGATGT CAT                 |
